# Supplementary material for: Effect of the Soil Matric Potential on the Germination Capacity of Prosopis chilensis, Quillaja saponaria and Cryptocarya alba from Contrasting Geographical Origins
Source: MDPI journal article supplement (doi:10.3390/plants11212963), 2022-11-02

**Table S1.** Defoliation or damage classes to define the Health Status of trees.

| Class | Defoliation (%) | Definition                                |
|-------|-----------------|-------------------------------------------|
| 0     | 0–10            | Trees without damage/no discoloration     |
| 1     | 11–25           | Slightly damaged/light discoloration      |
| 2     | 26–60           | Moderately damaged/moderate discoloration |
| 3     | 61–90           | Severely damaged/severe discoloration     |
| 4     | 91–100          | Dry or dead tree                          |

[48]

**Table S2.** Martonne arid index

| Value | Classification |
|-------|----------------|
| >40   | wet            |
| 30–40 | subhumid       |
| 20–30 | semiarid       |
| 10–20 | arid           |
| 5–10  | subdesert      |
| <5    | desert         |

its value is calculated using the formula  $I=P/(T+10)$  from the data obtained from the climograms (where T is the average annual temperature and P is the total annual quantity of water that falls in litres). According to this index, each geographical place will be classified according to its degree of aridity.

**Figure S1.** Water retention characteristic curve of sustrate.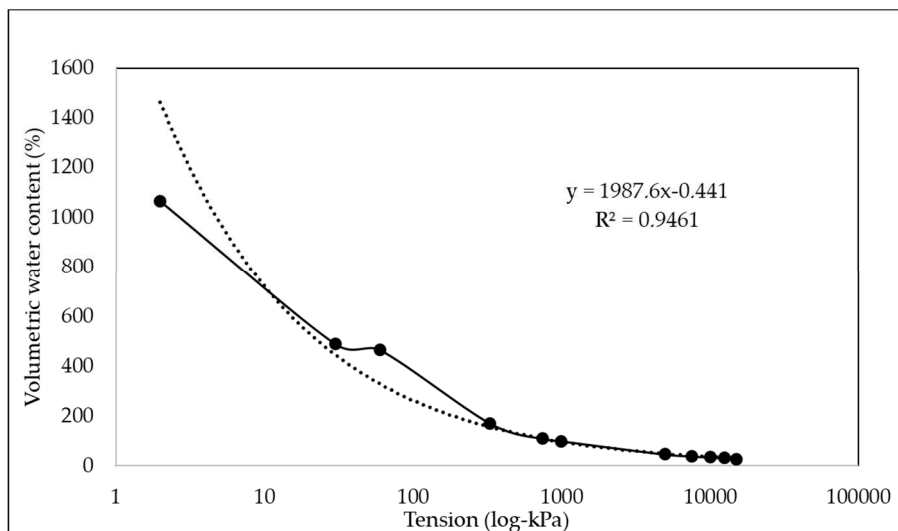

Supplement: s1 [file s1]
